# Supplementary material
Source: PubMed Central journal article supplement (PMC2948648)
Supplement: NIHMS228027-supplement-1.pdf [file NIHMS228027-supplement-1.pdf]

**Figure S1:** *Disease burden in leukemic mice*

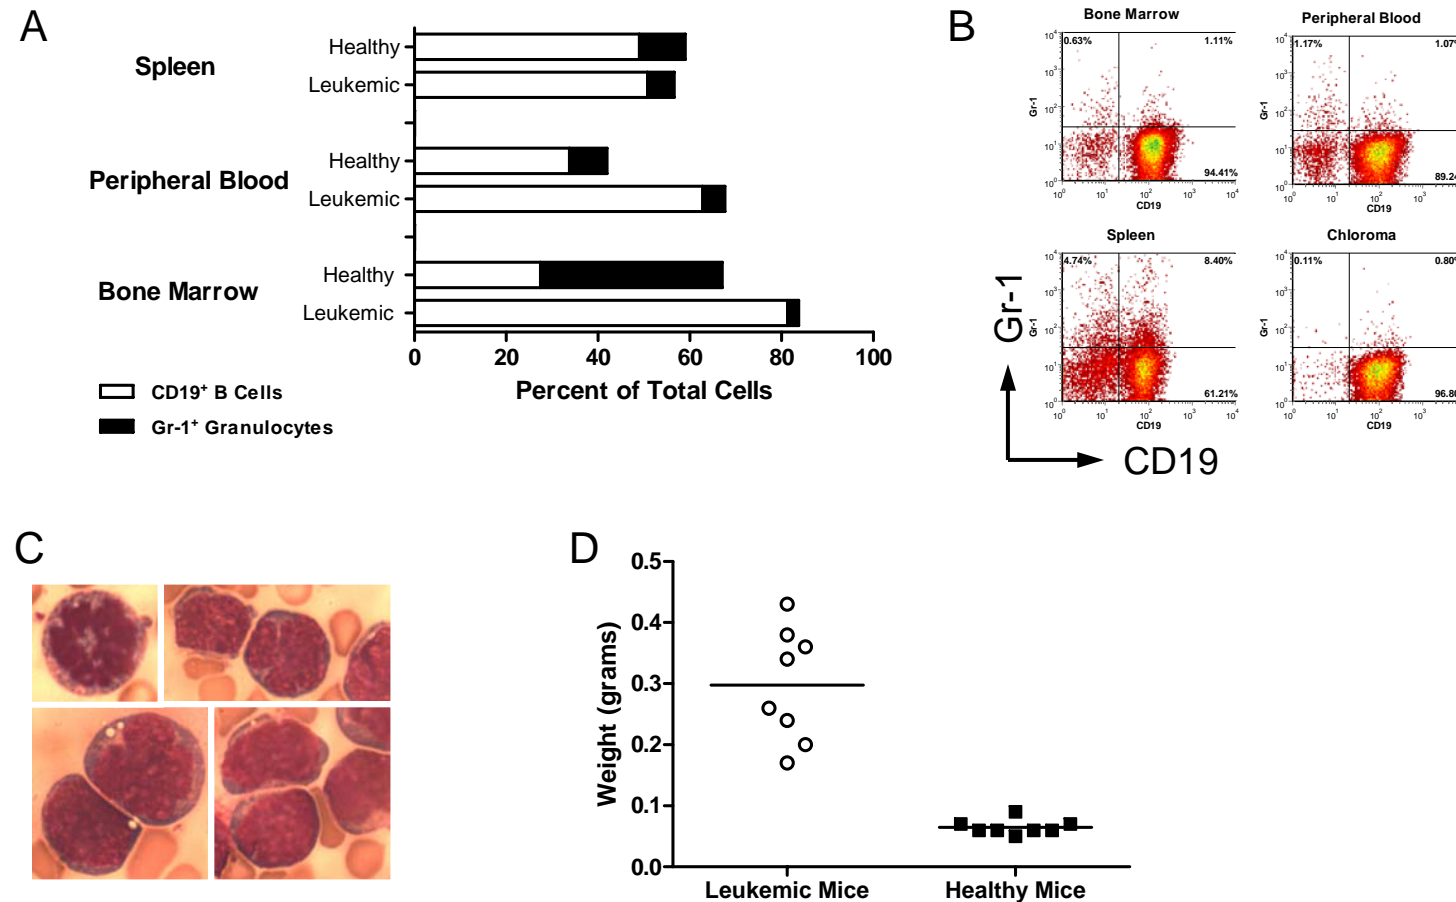

**Legend to Figure S1.**

(A) White blood cell differential counts in the spleen, peripheral blood (PBL), and bone marrow (BM) as determined by flow cytometry in mice developing leukemia. Gr-1 is a murine myeloid marker and CD19 represents the B cell population. Data is compiled from 8 leukemic mice and 8 healthy mice. (B) Representative flow cytometry data of a mouse with leukemia. Several mice developed solid masses of leukemia cells labeled here as “chloroma” in the above figure. (C) Peripheral blood smear of a diseased mouse demonstrating the presence of leukemic blasts, some of which were undergoing mitosis (upper left hand photo). (D) Spleen weight in mice developing leukemia compared to healthy mice.

**Figure S2:** Transformation characteristics of *AID*<sup>+/+</sup> and *AID*<sup>-/-</sup> *BCR-ABL1* ALL

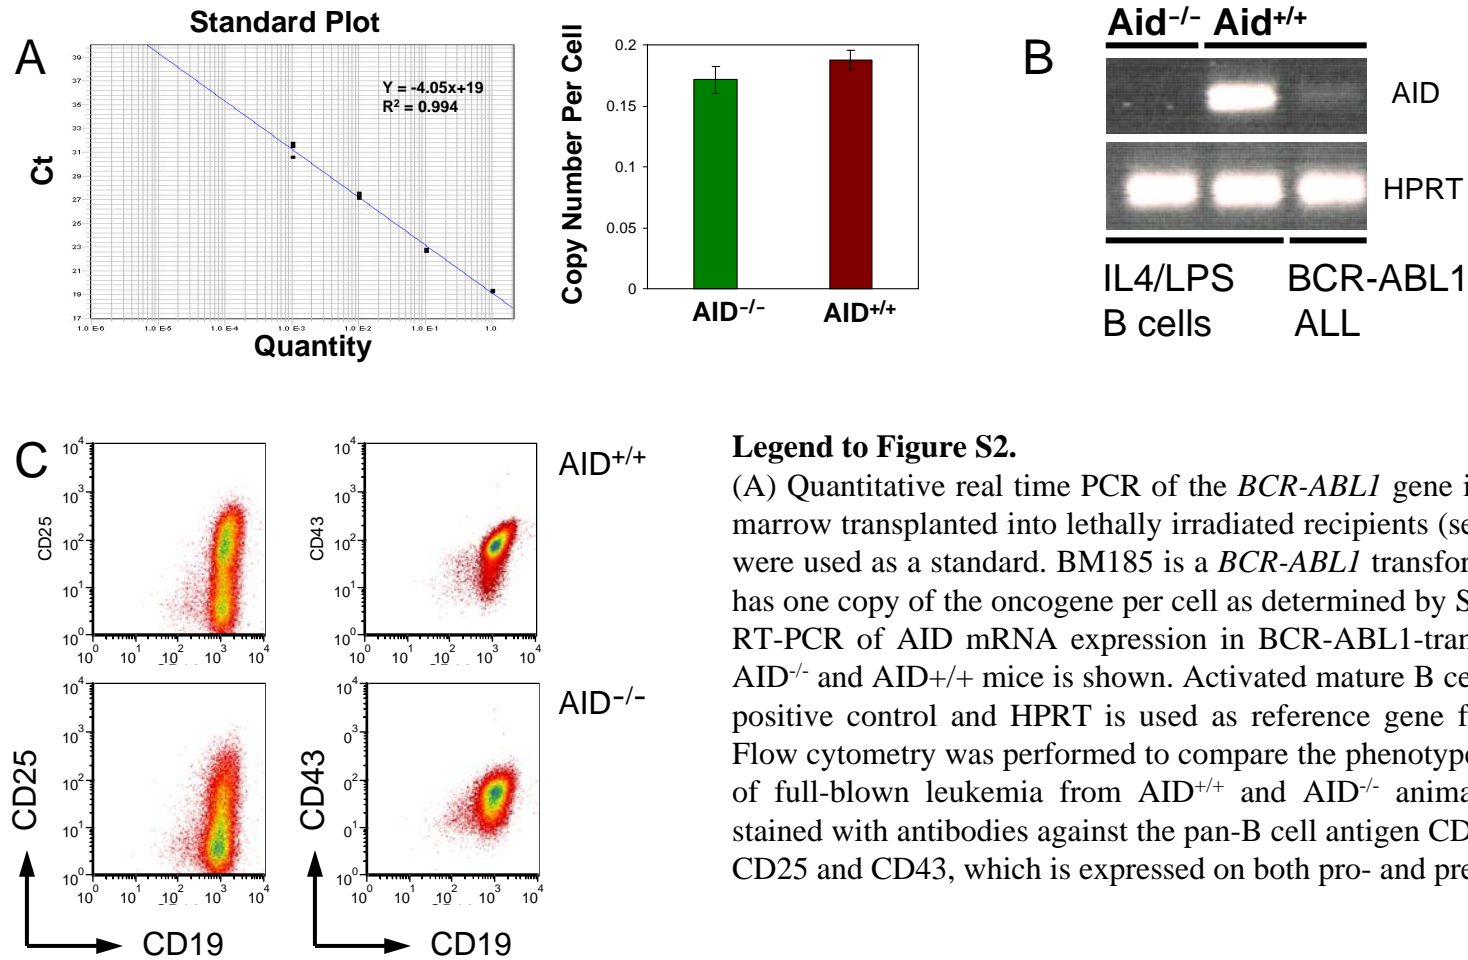

**Legend to Figure S2.**

(A) Quantitative real time PCR of the *BCR-ABL1* gene in *AID*<sup>-/-</sup> and *AID*<sup>+/+</sup> bone marrow transplanted into lethally irradiated recipients (see Figure 1). BM185 cells were used as a standard. BM185 is a *BCR-ABL1* transformed pre-B cell clone that has one copy of the oncogene per cell as determined by Southern blot analysis. (B) RT-PCR of *AID* mRNA expression in *BCR-ABL1*-transformed ALL cells from *AID*<sup>-/-</sup> and *AID*<sup>+/+</sup> mice is shown. Activated mature B cells (IL4, LPS) are used as positive control and *HPRT* is used as reference gene for RT-PCR analysis. (C) Flow cytometry was performed to compare the phenotype and differentiation stage of full-blown leukemia from *AID*<sup>+/+</sup> and *AID*<sup>-/-</sup> animals. Leukemia cells were stained with antibodies against the pan-B cell antigen CD19, the pre-B cell antigen CD25 and CD43, which is expressed on both pro- and pre-BI cells.

**Figure S3.** *Mechanisms of Imatinib resistance.*

**A.**

| Kinase Domain Sequencing of Imatinib Resistant Leukemia |   |          |                      |                      |
|---------------------------------------------------------|---|----------|----------------------|----------------------|
| Cohort                                                  | N | Mutation | Clones with Mutation | Imatinib Resistance* |
| <b>AID<sup>-/-</sup></b>                                | 3 |          |                      |                      |
| K3.3                                                    |   | None     | 0/11                 | NA                   |
| K5.3                                                    |   | None     | 0/11                 | NA                   |
| K7.3                                                    |   | V280G    | 10/11                | No                   |
| <b>AID<sup>+/+</sup></b>                                | 3 |          |                      |                      |
| W7.3                                                    |   | None     | 0/11                 | NA                   |
| W10.3                                                   |   | None     | 0/11                 | NA                   |
| W11.3                                                   |   | L387F    | 12/14                | Yes                  |

\*Soverini et al., 2006.

**B.**

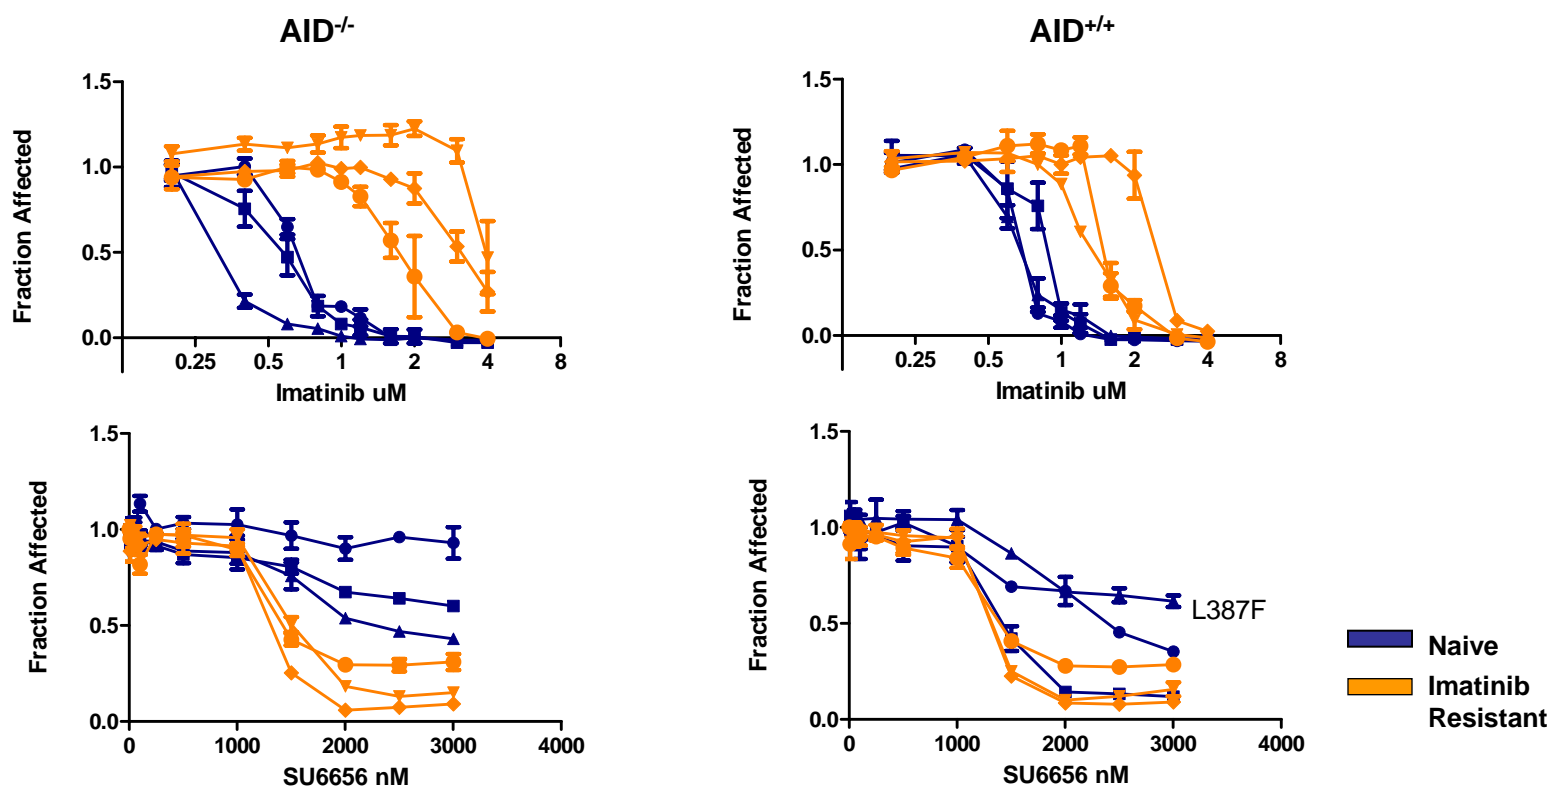

**Legend to Figure S3. Mechanisms of Imatinib resistance.**

A. Kinase domain sequencing of the *BCR-ABL1* oncogene. Three *AID*<sup>-/-</sup> and three *AID*<sup>+/+</sup> samples were grown in increasing concentrations of Imatinib every four to seven days, beginning with 0.05 μmol/l and ending with 1 μmol/l. DNA was extracted from Imatinib resistant cells, and the kinase domain was amplified, cloned and sequenced as described in Materials and Methods. B. Sensitivity of Imatinib resistant leukemia to Src inhibition. Imatinib resistant cells were generated as described in A. Imatinib resistant and Imatinib naïve cells were then plated and treated with increasing concentrations of either Imatinib or SU6656 as indicated. After 72 hours of incubation, proliferation was measured using a standard MTT assay. The *AID*<sup>+/+</sup> clone with a kinase domain mutation is indicated (L387F). Data is a representative example of results seen in three repeat experiments.

**Table S1. Genes Amplified and Deleted in AID<sup>-/-</sup> and AID<sup>+/+</sup> leukemia**

| Amplified                   |                             |                             |                             |                              |                              | Deleted                     |                             |                             |                             |                              |                              |
|-----------------------------|-----------------------------|-----------------------------|-----------------------------|------------------------------|------------------------------|-----------------------------|-----------------------------|-----------------------------|-----------------------------|------------------------------|------------------------------|
| AID <sup>-/-</sup> Mouse K3 | AID <sup>-/-</sup> Mouse K5 | AID <sup>-/-</sup> Mouse K7 | AID <sup>+/+</sup> Mouse W7 | AID <sup>+/+</sup> Mouse W10 | AID <sup>+/+</sup> Mouse W11 | AID <sup>-/-</sup> Mouse K3 | AID <sup>-/-</sup> Mouse K5 | AID <sup>-/-</sup> Mouse K7 | AID <sup>+/+</sup> Mouse W7 | AID <sup>+/+</sup> Mouse W10 | AID <sup>+/+</sup> Mouse W11 |
| Adam6                       | Arid5b                      | Adam6                       | Apol7c                      | Apol7c                       | Apol7c                       | Alox5                       | Cass4                       | Alox5                       | Adam6                       | Adam6                        | Adam6                        |
| Btbd9                       | Btbd9                       | Alk                         | Apol10a                     | Apol10a                      | Apol10a                      | Cass4                       | Crxos1                      | Cass4                       | Anln                        | Anln                         | Anln                         |
| Dnahc8                      | Dnahc8                      | Btbd9                       | Btbd9                       | Btbd9                        | Btbd9                        | Crxos1                      | Gcnt7                       | Crxos1                      | Bbs9                        | Bbs9                         | Bbs9                         |
| Glo1                        | Fst                         | Bzrap1                      | Chia                        | Chia                         | Chia                         | Gcnt7                       | H1foo                       | Gcnt7                       | Cass4                       | Cass4                        | Cass4                        |
| Glp1r                       | Glo1                        | Ccdc124                     | Chi3l3                      | Chi3l3                       | Chia                         | Luzp1                       | Luzp1                       | Luzp1                       | Ccne2                       | Ccne2                        | Ccne2                        |
| Gm711                       | Glp1r                       | Dnahc8                      | Chi3l4                      | Chi3l4                       | Chi3l3                       | Pla2g2e                     | Pla2g2e                     | Pla2g2e                     | Cd244                       | Ctnnd2                       | Cd244                        |
| Matn3                       | Gm711                       | Fst                         | Dap3                        | Dnahc8                       | Chi3l4                       | V1rf2                       | V1rf2                       | V1rf2                       | Ctnnd2                      | Cyp2b9                       | Ctnnd2                       |
| Msh3                        | Matn3                       | Glo1                        | Dnahc8                      | Glo1                         | Dnahc8                       | V1rf4                       | V1rf4                       | V1rf4                       | Cyp2b9                      | Cyp2b13                      | Cyp2b9                       |
| Mup1                        | Msh3                        | Glp1r                       | Glo1                        | Iltifb                       | Fst                          | Tcfe3                       | Tcfe3                       |                             | Cyp2b13                     | Ddx3y                        | Cyp2b13                      |
| Mup2                        | Mup1                        | Gm711                       | Irx5                        | Matn3                        | Glo1                         |                             |                             |                             | Ddx3y                       | Ebag9                        | Ddx3y                        |
| Mup5                        | Mup2                        | Matn3                       | Kcnj11                      | Mup1                         | Iltifb                       |                             |                             |                             | Ebag9                       | Eif2s3y                      | Ebag9                        |
| Naip1                       | Mup5                        | Mpo                         | Klf17                       | Mup2                         | Matn3                        |                             |                             |                             | Eif2s3y                     | Gcnt7                        | Eif2s3y                      |
| Obox1                       | Naip1                       | Msh3                        | Klhl1                       | Mup4                         | Mup1                         |                             |                             |                             | Gcnt7                       | H2al2y                       | Gcnt7                        |
| Obox3                       | Obox1                       | Mup1                        | Matn3                       | Mup5                         | Mup2                         |                             |                             |                             | H2al2y                      | Ints8                        | H2al2y                       |
| Obox5                       | Obox3                       | Mup2                        | Msto1                       | Nrxn3                        | Mup4                         |                             |                             |                             | Ints8                       | Jarid1d                      | Ints8                        |
| Rexo4                       | Obox5                       | Mup4                        | Mup1                        | Olf1040                      | Mup5                         |                             |                             |                             | Itn1                        | Pgcp                         | Itn1                         |
| Setx                        | Osbpl3                      | Mup5                        | Mup2                        | Osbpl3                       | Nrxn3                        |                             |                             |                             | Jarid1d                     | rp9                          | Jarid1d                      |
| Surf4                       | Rexo4                       | Naip1                       | Mup5                        | Scoc                         | Olf1040                      |                             |                             |                             | Pgcp                        | Sntg1                        | Pgcp                         |
| V1rd14                      | Setx                        | Obox1                       | Nomo1                       | Serpina1a                    | Osbpl3                       |                             |                             |                             | rp9                         | Sry                          | Ptpn2                        |
| V1rd21                      | Sox6                        | Obox3                       | Nrxn3                       | Serpina1c                    | Serpina1a                    |                             |                             |                             | Tmem181                     | Trpm8                        | rp9                          |
|                             | Surf4                       | Obox5                       | Olf1040                     | Serpina1e                    | Serpina1c                    |                             |                             |                             | Trpm8                       | Ube1y1                       | Tmem181                      |
| chr12 (entire)              | V1rd14                      | Osbpl3                      | Osbpl3                      | Sirpb1                       | Serpina1e                    |                             |                             |                             | Tulp4                       | Ugt1a1                       | Trpm8                        |
|                             | V1rd21                      | Rexo4                       | Rap1gap                     | Skint6                       | Sirpb1                       |                             |                             |                             | Sry                         | Ugt1a2                       | Tulp4                        |
|                             |                             | Setx                        | Scoc                        | Slc9a10                      | Skint6                       |                             |                             |                             | Sytl3                       | Ugt1a5                       | Sntg1                        |
|                             |                             | Sox6                        | Serpina1a                   | Sox6                         | Slc9a10                      |                             |                             |                             | Ube1y1                      | Ugt1a6a                      | Sry                          |
|                             |                             | Surf4                       | Serpina1c                   | Stfa1                        | Sox6                         |                             |                             |                             | Ugt1a1                      | Ugt1a6b                      | Sytl3                        |
|                             |                             | V1rd14                      | Serpina1e                   | Stfa1                        | Stfa1                        |                             |                             |                             | Ugt1a2                      | Ugt1a7c                      | Ube1y1                       |
|                             |                             | V1rd21                      | Sirpb1                      | chr X (entire)               |                              |                             |                             |                             | Ugt1a5                      | Ugt1a9                       | Ugt1a1                       |
|                             |                             |                             | Skint6                      |                              | chr X (entire)               |                             |                             |                             | Ugt1a6a                     | Ugt1a10                      | Ugt1a2                       |
|                             |                             |                             | Slc9a10                     |                              |                              |                             |                             |                             | Ugt1a6b                     | Uty                          | Ugt1a5                       |
|                             |                             |                             | Sox6                        |                              |                              |                             |                             |                             | Ugt1a7c                     | Vmn2r121                     | Ugt1a6a                      |
|                             |                             |                             | Stfa1                       |                              |                              |                             |                             |                             | Ugt1a9                      | Zfy1                         | Ugt1a6b                      |
|                             |                             |                             | Zscan4f                     |                              |                              |                             |                             |                             | Ugt1a10                     | Zfy2                         | Ugt1a7c                      |
|                             |                             |                             |                             | chr18 (entire)               |                              |                             |                             |                             | Usp9y                       |                              | Ugt1a9                       |
|                             |                             |                             |                             | chr X (entire)               |                              |                             |                             |                             | Uty                         |                              | Ugt1a10                      |
|                             |                             |                             |                             |                              |                              |                             |                             |                             | Vmn2r121                    |                              | Usp9y                        |
|                             |                             |                             |                             |                              |                              |                             |                             |                             | Zfy1                        |                              | Uty                          |
|                             |                             |                             |                             |                              |                              |                             |                             |                             | Zfy2                        |                              | Vmn2r121                     |
|                             |                             |                             |                             |                              |                              |                             |                             |                             |                             |                              | Zfy1                         |
|                             |                             |                             |                             |                              |                              |                             |                             |                             |                             |                              | Zfy2                         |

Genes listed in alphabetical order.

Aberration detection method 2 (ADM-2) with centralization, fuzzy correction, and default filters was used to define aberrant intervals with DNA Analytics 4.0 software.

**Table S2. Genes differentially expressed in AID<sup>-/-</sup> vs. AID<sup>+/+</sup> leukemia**

| Probe Set ID                            | Gene Title                                                                       | Gene Symbol                    | Fold Change | F ratio* | p-value* |
|-----------------------------------------|----------------------------------------------------------------------------------|--------------------------------|-------------|----------|----------|
| <b>Upregulated in AID<sup>-/-</sup></b> |                                                                                  |                                |             |          |          |
| 1459854_s_at                            | dynein light chain Tctex-type 3                                                  | Dynlt3                         | 83.06       | 4781.29  | 2.62E-07 |
| 1452077_at                              | DEAD (Asp-Glu-Ala-Asp) box polypeptide 3, Y-linked                               | Ddx3y                          | 49.13       | 4228.9   | 3.35E-07 |
| 1426523_a_at                            | glucosamine-6-phosphate deaminase 2                                              | Gnpda2                         | 45.13       | 3779.02  | 4.19E-07 |
| 1424903_at                              | jumonji, AT rich interactive domain 1D (Rbp2 like)                               | Jarid1d                        | 33.87       | 3402.59  | 5.17E-07 |
| 1426535_at                              | KTEL (Lys-Tyr-Glu-Leu) containing 1                                              | Ktelc1                         | 21.88       | 3019.42  | 6.57E-07 |
| 1420614_at                              | dynein light chain Tctex-type 3                                                  | Dynlt3                         | 40.46       | 2927.37  | 6.99E-07 |
| 1459843_s_at                            | MAD homolog 1 (Drosophila)                                                       | Smad1                          | 59.55       | 2742.57  | 7.96E-07 |
| 1446627_at                              | ---                                                                              | ---                            | 5.76        | 2575.49  | 9.02E-07 |
| 1426438_at                              | DEAD (Asp-Glu-Ala-Asp) box polypeptide 3, Y-linked                               | Ddx3y                          | 95.19       | 2445.98  | 1.00E-06 |
| 1450021_at                              | ubiquilin 2                                                                      | Ubqln2                         | 174.04      | 2147     | 1.30E-06 |
| 1450959_at                              | RIKEN cDNA D930014E17 gene                                                       | D930014E17Rik                  | 20.83       | 2025.9   | 1.46E-06 |
| 1449929_at                              | dynein light chain Tctex-type 3                                                  | Dynlt3                         | 79.13       | 1942.43  | 1.58E-06 |
| 1434131_at                              | RUN and FYVE domain containing 1                                                 | Rufy1                          | 12.9        | 1881.39  | 1.69E-06 |
| 1421947_at                              | guanine nucleotide binding protein (G protein), gamma 12                         | Gng12                          | 18.14       | 1864.4   | 1.72E-06 |
| 1434665_at                              | aspartylglucosaminidase                                                          | Aga                            | 2.63        | 1789.5   | 1.87E-06 |
| 1426439_at                              | DEAD (Asp-Glu-Ala-Asp) box polypeptide 3, Y-linked                               | Ddx3y                          | 28.38       | 1663.99  | 2.16E-06 |
| 1437002_at                              | family with sequence similarity 73, member A                                     | Fam73a                         | 5.07        | 1647.13  | 2.20E-06 |
| 1448892_at                              | dedicator of cytokinesis 7                                                       | Dock7                          | 38.62       | 1566.79  | 2.43E-06 |
| 1434857_at                              | RIKEN cDNA A230106D06 gene                                                       | A230106D06Rik                  | 17.31       | 1523.74  | 2.57E-06 |
| 1440972_at                              | nuclear receptor-binding SET-domain protein 1                                    | Nsd1                           | 1.7         | 1452.49  | 2.83E-06 |
| 1448844_at                              | cytochrome b5 type B                                                             | Cyb5b                          | 2.1         | 1084.55  | 5.07E-06 |
| 1451721_a_at                            | histocompatibility 2, class II antigen A, beta 1 /// response to metastatic canc | H2-Ab1 /// Rmcs2 /// Rmcs5     | 6.62        | 1034.43  | 5.57E-06 |
| 1449124_at                              | ral guanine nucleotide dissociation stimulator,-like 1                           | Rgl1                           | 2.65        | 1031.34  | 5.60E-06 |
| 1453071_s_at                            | KDEL (Lys-Asp-Glu-Leu) containing 2                                              | Kdelc2                         | 12.42       | 1011.99  | 5.82E-06 |
| 1416554_at                              | similar to Pdlim1 protein /// PDZ and LIM domain 1 (elfin)                       | LOC100048338 /// Pdlim1        | 21.13       | 1010.17  | 5.84E-06 |
| 1458585_at                              | ---                                                                              | ---                            | 5.57        | 1002.48  | 5.93E-06 |
| 1415831_at                              | proteasome (prosome, macropain) 26S subunit, non-ATPase, 2                       | Psmd2                          | 1.21        | 1002.26  | 5.93E-06 |
| 1426598_at                              | ubiquitously transcribed tetratricopeptide repeat gene, Y chromosome             | Uty                            | 11.95       | 958.745  | 6.48E-06 |
| 1428695_at                              | short chain dehydrogenase/reductase family 39U, member 1                         | Sdr39u1                        | 3.08        | 938.464  | 6.76E-06 |
| 1429519_at                              | fucose-1-phosphate guanylyltransferase                                           | Fpgt                           | 26.53       | 930.051  | 6.89E-06 |
| 1438504_x_at                            | Transmembrane 7 superfamily member 3 (Tm7sf3), mRNA                              | Tm7sf3                         | 13.47       | 929.388  | 6.90E-06 |
| 1433695_at                              | cannabinoid receptor interacting protein 1                                       | Cnrip1                         | 21.69       | 926.451  | 6.94E-06 |
| 1449870_a_at                            | ATPase, H+ transporting, lysosomal V0 subunit A2                                 | Atp6v0a2                       | 1.51        | 900.951  | 7.34E-06 |
| 1440263_at                              | neural regeneration protein                                                      | Nrp                            | 1.55        | 863.884  | 7.98E-06 |
| 1428972_at                              | Tctex1 domain containing 2                                                       | Tctex1d2                       | 24.84       | 804.155  | 9.20E-06 |
| 1460359_at                              | armadillo repeat containing, X-linked 3 /// hypothetical protein LOC100044266    | Armcx3 /// LOC100044266        | 12.9        | 792.053  | 9.48E-06 |
| 1416020_a_at                            | ATP synthase, H+ transporting, mitochondrial F0 complex, subunit c (subunit 9),  | Atp5g1 /// ENSMUSG00000058357  | 1.5         | 754.148  | 1.05E-05 |
| 1428458_at                              | processing of precursor 1, ribonuclease P/MRP family, (S. cerevisiae)            | Pop1                           | 2.34        | 744.595  | 1.07E-05 |
| 1416007_at                              | special AT-rich sequence binding protein 1                                       | Satb1                          | 21.3        | 737.342  | 1.09E-05 |
| 1436350_at                              | family with sequence similarity 171, member B                                    | Fam171b                        | 1.8         | 726.688  | 1.13E-05 |
| 1458719_at                              | ---                                                                              | ---                            | 1.98        | 722.741  | 1.14E-05 |
| 1456395_at                              | peroxisome proliferative activated receptor, gamma, coactivator 1 alpha          | Ppargc1a                       | 6           | 721.836  | 1.14E-05 |
| 1453287_at                              | ankyrin repeat domain 33B                                                        | Ankrd33b                       | 13.32       | 721.296  | 1.14E-05 |
| 1434138_at                              | prune homolog (Drosophila)                                                       | Prune                          | 1.46        | 714.911  | 1.16E-05 |
| 1436910_at                              | RAS protein activator like 2                                                     | Rasal2                         | 12.07       | 696.401  | 1.23E-05 |
| 1455213_at                              | RIKEN cDNA 4930488E11 gene /// thymosin beta-like                                | 4930488E11Rik /// LOC100034363 | 10.32       | 692.862  | 1.24E-05 |
| 1458274_at                              | zinc finger protein 69                                                           | Zfp69                          | 2.34        | 676.526  | 1.30E-05 |
| 1417886_at                              | RIKEN cDNA 1810009A15 gene /// hypothetical protein LOC100048454                 | 1810009A15Rik /// LOC100048454 | 1.7         | 668.652  | 1.33E-05 |
| 1455719_at                              | tubulin, beta 5                                                                  | Tubb5                          | 3.77        | 666.686  | 1.34E-05 |
| 1438463_x_at                            | zinc finger, DHHC domain containing 6                                            | Zdhhc6                         | 1.16        | 663.329  | 1.35E-05 |
| 1447934_at                              | RIKEN cDNA 9630033F20 gene /// similar to RIKEN cDNA 9630033F20 gene             | 9630033F20Rik /// LOC677429    | 2.29        | 656.517  | 1.38E-05 |
| 1426524_at                              | glucosamine-6-phosphate deaminase 2                                              | Gnpda2                         | 24.14       | 642.712  | 1.44E-05 |
| 1428331_at                              | RIKEN cDNA 2210016F16 gene                                                       | 2210016F16Rik                  | 11.78       | 632.922  | 1.48E-05 |

|                                           |                                                                                  |                        |         |         |          |
|-------------------------------------------|----------------------------------------------------------------------------------|------------------------|---------|---------|----------|
| 1457259_at                                | similar to sorting nexin 6                                                       | LOC100047864           | 2.12    | 627.753 | 1.51E-05 |
| 1441071_at                                | potassium voltage-gated channel, subfamily Q, member 5                           | Kcnq5                  | 8.16    | 627.338 | 1.51E-05 |
| 1418394_a_at                              | CD97 antigen                                                                     | Cd97                   | 18.26   | 623.958 | 1.52E-05 |
| 1437303_at                                | interleukin 6 signal transducer                                                  | Il6st                  | 6.77    | 591.027 | 1.70E-05 |
| 1429399_at                                | ring finger protein 125                                                          | Rnf125                 | 33.07   | 589.892 | 1.70E-05 |
| 1415698_at                                | golgi membrane protein 1                                                         | Golm1                  | 11.05   | 588.225 | 1.71E-05 |
| 1416782_s_at                              | PRA1 domain family 2                                                             | Prpf2                  | 5.87    | 586.751 | 1.72E-05 |
| 1459733_at                                | ---                                                                              | ---                    | 2.94    | 566.196 | 1.85E-05 |
| <b>Downregulated in AID<sup>-/-</sup></b> |                                                                                  |                        |         |         |          |
| 1427262_at                                | inactive X specific transcripts                                                  | Xist                   | -411.08 | 10855.5 | 5.09E-08 |
| 1441264_x_at                              | RIKEN cDNA A930005H10 gene                                                       | A930005H10Rik          | -1.71   | 4552.33 | 2.89E-07 |
| 1441885_s_at                              | ---                                                                              | ---                    | -11     | 2495.52 | 9.61E-07 |
| 1452426_x_at                              | ---                                                                              | ---                    | -36.15  | 2358.79 | 1.08E-06 |
| 1452483_a_at                              | CD44 antigen                                                                     | Cd44                   | -9.02   | 1949.49 | 1.57E-06 |
| 1437538_at                                | small nucleolar RNA host gene (non-protein coding) 7                             | Snhg7                  | -2.09   | 1847.07 | 1.75E-06 |
| 1454959_s_at                              | guanine nucleotide binding protein (G protein), alpha inhibiting 1               | Gnai1                  | -94.14  | 1735.76 | 1.98E-06 |
| 1439847_s_at                              | Kruppel-like factor 12                                                           | Klf12                  | -11.63  | 1710.17 | 2.04E-06 |
| 1439055_at                                | predicted gene, OTTMUSG00000025408                                               | OTTMUSG00000025408     | -6.87   | 1640.2  | 2.22E-06 |
| 1440870_at                                | PR domain containing 16                                                          | Prdm16                 | -16.95  | 1385.96 | 3.11E-06 |
| 1439196_at                                | hook homolog 3 (Drosophila)                                                      | Hook3                  | -1.19   | 1337.59 | 3.34E-06 |
| 1418504_at                                | heat shock protein 9                                                             | Hspa9                  | -1.55   | 1232.51 | 3.93E-06 |
| 1452452_at                                | ---                                                                              | ---                    | -1.72   | 1149.14 | 4.52E-06 |
| 1435789_x_at                              | ---                                                                              | ---                    | -1.88   | 1115.44 | 4.79E-06 |
| 1425493_at                                | bone morphogenetic protein receptor, type 1A                                     | Bmpr1a                 | -14.2   | 1080.53 | 5.11E-06 |
| 1441518_at                                | ---                                                                              | ---                    | -10.82  | 1064.07 | 5.27E-06 |
| 1429197_s_at                              | RAB GTPase activating protein 1-like                                             | Rabgap11               | -10.68  | 1052.27 | 5.38E-06 |
| 1450994_at                                | Rho-associated coiled-coil containing protein kinase 1                           | Rock1                  | -1.58   | 1017.9  | 5.75E-06 |
| 1438324_at                                | RIKEN cDNA 9330182L06 gene                                                       | 9330182L06Rik          | -4.03   | 989.176 | 6.09E-06 |
| 1456789_at                                | zinc finger protein 462                                                          | Zfp462                 | -30.27  | 966.047 | 6.39E-06 |
| 1420509_at                                | serum response factor binding protein 1                                          | Srfbp1                 | -1.49   | 961.961 | 6.44E-06 |
| 1442075_at                                | expressed sequence AI314604                                                      | AI314604               | -2.35   | 907.217 | 7.24E-06 |
| 1460256_at                                | carbonic anhydrase 3                                                             | Car3                   | -2.73   | 902.66  | 7.31E-06 |
| 1427263_at                                | inactive X specific transcripts                                                  | Xist                   | -65.79  | 900.544 | 7.34E-06 |
| 1449434_at                                | carbonic anhydrase 3                                                             | Car3                   | -4.94   | 860.593 | 8.04E-06 |
| 1453101_at                                | kelch-like 25 (Drosophila)                                                       | Klhl25                 | -6.26   | 799.136 | 9.32E-06 |
| 1443153_at                                | ---                                                                              | ---                    | -2.15   | 792.443 | 9.47E-06 |
| 1454714_x_at                              | predicted gene, EG665516 /// predicted gene, EG666036 /// predicted gene, EG6687 | EG665516 /// Phgdh     | -120.48 | 768.03  | 1.01E-05 |
| 1440279_at                                | thioredoxin domain containing 10                                                 | Txndc10                | -1.723  | 767.929 | 1.01E-05 |
| 1427144_at                                | heterogeneous nuclear ribonucleoprotein L-like                                   | Hnrpll                 | -104.21 | 732.343 | 1.11E-05 |
| 1422952_at                                | Ng23 protein                                                                     | Ng23                   | -4.56   | 722.632 | 1.14E-05 |
| 1431297_a_at                              | RIKEN cDNA 4933436C20 gene                                                       | 4933436C20Rik          | -9.35   | 722.363 | 1.14E-05 |
| 1417135_at                                | serine/arginine-rich protein specific kinase 2                                   | Srpk2                  | -1.52   | 705.92  | 1.19E-05 |
| 1435397_at                                | zinc finger and BTB domain containing 44                                         | Zbtb44                 | -3.55   | 690.991 | 1.24E-05 |
| 1424607_a_at                              | predicted gene, 100039204 /// predicted gene, 100040620 /// predicted gene, 1000 | Cwc22 /// LOC100047648 | -8.86   | 676.682 | 1.30E-05 |
| 1436364_x_at                              | nuclear factor I/X                                                               | Nfix                   | -5.87   | 670.024 | 1.32E-05 |
| 1455281_at                                | WD repeat domain 33                                                              | Wdr33                  | -2.05   | 654.554 | 1.39E-05 |
| 1451356_at                                | acidic (leucine-rich) nuclear phosphoprotein 32 family, member E                 | Anp32e                 | -1.38   | 641.68  | 1.44E-05 |
| 1425471_x_at                              | ---                                                                              | ---                    | -3.45   | 624.285 | 1.52E-05 |
| 1419381_at                                | telomeric repeat binding factor 2, interacting protein                           | Terf2ip                | -1.64   | 605.428 | 1.62E-05 |
| 1443932_at                                | kelch domain containing 1                                                        | Klhdc1                 | -24.23  | 603.745 | 1.63E-05 |
| 1436627_at                                | DNA segment, Chr 17, ERATO Doi 663, expressed                                    | D17Ertdd663e           | -2.13   | 601.299 | 1.64E-05 |
| 1418843_at                                | solute carrier family 30 (zinc transporter), member 4                            | Slc30a4                | -2.71   | 599.024 | 1.65E-05 |
| 1429621_at                                | cullin-associated and neddylation-dissociated 2 (putative)                       | Cand2                  | -12.14  | 586.08  | 1.73E-05 |

\*F ratio and corresponding p value as determined by one-way ANOVA. F is the ratio of the mean of the squares between cohorts to the mean of the squares within each cohort.

Only the top 105 genes are shown. Primary data are available in the Gene Expression Omnibus database under accession number GSE16751.

**Table S3:** *Supplemental information on experimental methods and techniques**Oligonucleotides used and conditions for PCR and sequencing*

|                 |                         |                               |
|-----------------|-------------------------|-------------------------------|
| <i>AID</i>      | Forward                 | 5'-AAATGTCCGCTGGGCCAA-3'      |
|                 | Reverse                 | 5'-CATCGACTTCGTACAAGGG-3'     |
| <i>Hprt</i>     | Forward                 | 5'-GGGGGCTATAAGTTCTTTGC-3'    |
|                 | Reverse                 | 5'-TCCAACACTTCGAGAGGTCC-3'    |
| <i>Arhgap26</i> | Forward                 | 5'-TCCATGACAACCTGCTGCTTC-3'   |
|                 | Reverse                 | 5'-AAAATCCAATGGCCTCCTCT-3'    |
| <i>Blnk</i>     | Forward                 | 5'-TCCATCAAAAGCCTGTACCC-3'    |
|                 | Reverse                 | 5'-AAACGATCCATCCTTGTTGG-3'    |
| <i>Cdkn1a</i>   | Forward                 | 5'-TGAATACCGTGGGTGTCAA-3'     |
|                 | Reverse                 | 5'-GTGTGAGGACTCGGGACAAT-3'    |
| <i>Rhob</i>     | Forward                 | 5'-CTATGTGGCGGACATCGAG-3'     |
|                 | Reverse                 | 5'-TTGGGGCAGAAGTGCTTTAC-3'    |
| <i>Rhoh</i>     | Forward                 | 5'-TGAACAAGCTTTCTGCATGG-3'    |
|                 | Reverse                 | 5'-ATGGCATAGTTGGGAAATGC-3'    |
| <i>Ubqln2</i>   | Forward                 | 5'-TCCCAGGAGTAGCTCCACAC-3'    |
|                 | Reverse                 | 5'-CGAAAGCATGCTCTGAACAA-3'    |
| <i>Flnb</i>     | Forward                 | 5'-TCAGCAAACAGGTTTTCCAG-3'    |
|                 | Reverse                 | 5'-GTGGGTGGCCCTAGTAAAAA-3'    |
| <i>Pax5</i>     | Forward                 | 5'-GGAGGAGTGAATCAGCTTGG-3'    |
|                 | Reverse                 | 5'-TACTGAGGGTGGCTGTAGGG-3'    |
| <i>Pim1</i>     | Forward                 | 5'-GGAGGAGTGAATCAGCTTGG-3'    |
|                 | Reverse                 | 5'-TACTGAGGGTGGCTGTAGGG-3'    |
| <i>Rhoh</i>     | Forward                 | 5'-ACTCACTTCGGCACAGGAAC-3'    |
|                 | Reverse                 | 5'-CTAAGGGAATGTCCGTGGAA-3'.   |
| <i>BCR-ABL1</i> | Forward 1 <sup>st</sup> | 5'-CAGAACTCGCAACAGTCCTT-3'    |
|                 | Reverse 1 <sup>st</sup> | 5'-CTTGATGGAGAACTTGTTGTAGG-3' |
|                 | Forward 2 <sup>nd</sup> | 5'-CGAGTTGGTTCATCATCATTC-3'   |
|                 | Reverse 2 <sup>nd</sup> | 5'-CTTGATGGAGAACTTGTTGTAGG-3' |



### *Quantitative RT-PCR*

Quantitative real time RT-PCR was carried out with SYBRGreenER mix (Invitrogen). Expression data was normalized against murine *Hprt* controls (Primer sequences listed above). For confirmatory quantitative real time RT-PCR, RNA was reverse transcribed to cDNA using Superscript III Reverse Transcriptase (Invitrogen). **Data are shown as a percentage of murine *Hprt* gene expression. For each gene, 5 *AID*<sup>-/-</sup> samples and 5 *AID*<sup>+/+</sup> samples from different mice were analyzed.**

### *PCR amplification and sequencing*

PCR reactions were performed with Phusion polymerase (New England Biolabs, Cambridge, MA) using either 50ng genomic DNA template (*BCR-ABL1*, *Rhoh*, *Pim1*, and *Flnb*) or cDNA (*Pax5*). Amplification of *BCR-ABL1* was done with two rounds of PCR, in the first round the fusion oncogene was amplified followed by amplification of the *ABL1* kinase domain. Product DNA was purified using Minielute columns (Qiagen, Valencia, CA) and then cloned with the TOPO TA Cloning Kit as per manufacturer's instructions (Invitrogen). Briefly, PCR product was cloned into the pCR4-TOPO vector at room temperature for 30 minutes. Following transformation of TOP10 chemically competent bacteria (Invitrogen), colonies were picked for subsequent colony PCR with the provided M13 primers using Phusion DNA polymerase. DNA sequencing on products was performed with T3 and T7 primers using an ABI 3730 DNA Analyzer.

### *Expression vectors and viral transduction*

The MSCV-P190 BCR-ABL1-PGK-NEO vector was kindly provided by Dr. Richard Van Etten, Tufts University. Retroviral supernatant was produced by transient transfection of 293T cells as previously described (18).

### *Mouse bone marrow transplants*

Bone marrow of male Balb/c *AID*<sup>+/+</sup> or *AID*<sup>-/-</sup> mice was harvested and cultured in the presence of 10 ng/ml murine interleukin-7 (mIL-7) and 50 ng/ml murine Flt3 ligand (mFlt3L) for 48 hours prior to transduction on RetroNectin (Takara Bio Inc.) coated plates. 24 hours following transduction cells were harvested and transplanted into lethally irradiated female Balb/c recipients (900 Gy in two fractions separated by 12 hours) at a dose of 10<sup>6</sup> cells per mouse via intravenous injection. Mice were treated for 21 days post transplant with tetracycline administered through the drinking water as a prophylactic measure while they are immunocompromised (200 µg/ml). Leukemia cells from sacrificed mice were recovered from the peripheral blood and spleen and purified by CD19 MACS microbead technology (Miltenyi Biotec). These cells were maintained in IMDM supplemented with 50 µmol/l 2-mercaptoethanol and 10% fetal bovine serum until they were transplanted into secondary recipients. For secondary transplants, recipients were conditioned with lethal irradiation as described above. 10<sup>4</sup> leukemia cells were injected intravenously along with 10<sup>6</sup> bone marrow cells from Balb/c mice harvested 24 hours prior and maintained in 10 ng/ml murine interleukin-3 (mIL-3), 2.5 ng/ml murine stem cell factor (mSCF), and 25 ng/ml murine interleukin-6 (mIL-6) overnight.
